# Supplementary material for: Magnetostatic reciprocity for MR magnet design
Source: Copernicus journal article supplement (doi:10.5194/mr-2021-34), 2021-04-26
Supplement: Supplementary file [file mr-2021-34-CC3-supplement.pdf]

Comments on Jean's reciprocity. Tom Barbara 5/13/21

Here are further aspects of my previous comments on the Jeans reciprocity that this submission uses in their design efforts. For each *prescribed* source  $\mathbf{M}_1$  and  $\mathbf{M}_2$  we have (in Gaussian units)

$$\mathbf{B}_i - \mathbf{H}_i = 4\pi \mathbf{M}_i \quad (1)$$

$$\nabla \times \mathbf{H}_i = 0$$

$$\nabla \cdot \mathbf{B}_i = 0$$

It is important to emphasize that the  $\mathbf{M}_i$  are prescribed sources, that is that the magnetizations are saturated or fixed, as discussed in Jackson's book on E&M.

We can take scalar products of (1) for each source and  $\mathbf{H}_j$  for the other, and take their difference

$$\mathbf{H}_2 \cdot (\mathbf{B}_1 - \mathbf{H}_1) = 4\pi \mathbf{H}_2 \cdot \mathbf{M}_1$$

$$\mathbf{H}_1 \cdot (\mathbf{B}_2 - \mathbf{H}_2) = 4\pi \mathbf{H}_1 \cdot \mathbf{M}_2$$

The terms in  $\mathbf{H}$  for each source are thereby eliminated. After integrating over all space, the mixed field terms vanish by the fact that they are "Helmholtz pairs", so that we are left with

$$\int d^3x \mathbf{H}_1 \cdot \mathbf{M}_2 = \int d^3x \mathbf{H}_2 \cdot \mathbf{M}_1$$

I believe this is a clearer statement of the Jeans reciprocity. Of course the validity of this theorem does require linear superposition which follows from the assumption that the sources are prescribed.
